# Supplementary material
Source: Springer Nature journal article supplement (https://www.springermedizin.de/resource/supplementary/12958_2008_494_MOESM4_ESM.pdf/9568146)

Amnion Chorion Decidua

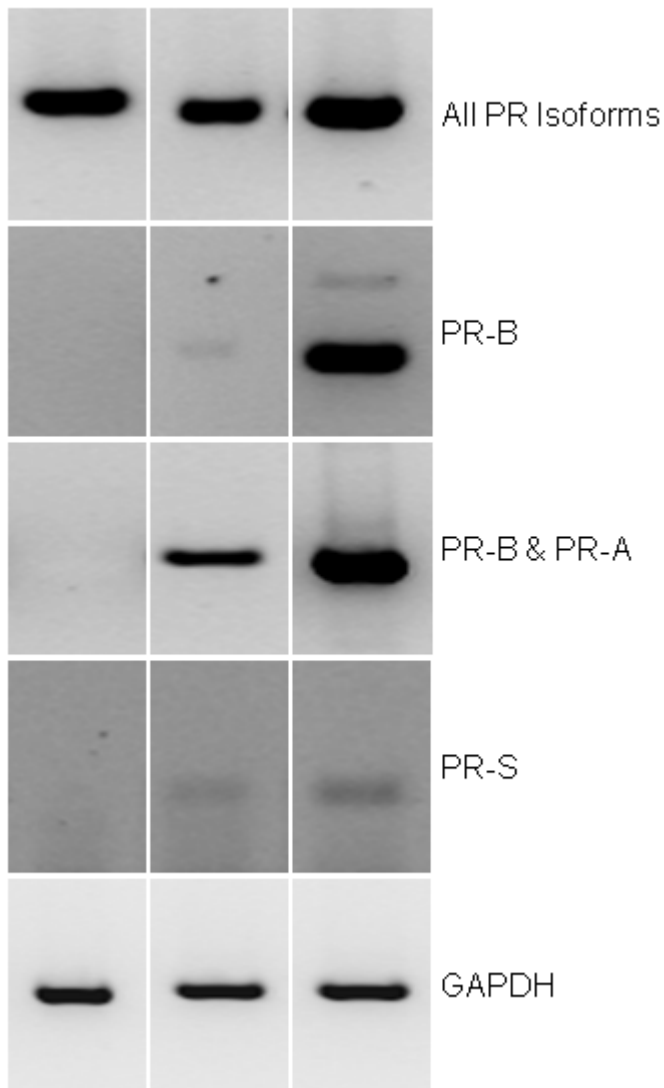

Supplement: MOESM4 [file 9568146]
